# Supplementary material for: Perceptions of Veterinarians and Veterinary Students on What Risk Factors Constitute Medical Disputes and Comparisons between 2014 and 2022
Source: MDPI journal article supplement (doi:10.3390/vetsci10030200), 2023-03-06
Supplement: s1 [file s1]

I. Interviewee's information

Birthdate (this research will only include participants of 21 years and above)

1. Gender: ☐ Male ☐ Female

2. Stakeholder's position:

☐ a) Veterinarian

☐ b) Veterinary Student.

☐ c) Client.

II. Survey on experience of companion animal medical disputes.

(Animal medical disputes: Disputes related to treatment of companion animals)

1. Have you ever had an experience of animal medical disputes?

☐ a) Yes (includes the complainant, respondent and a person who has knowledge of the complaint)

(Please go to the next question)

☐ b) No (Please go to question 3)

2. Following the previous question, how was the complaint resolved?

☐ a) Resolved by simple communication.

☐ b) Resolved by communication and reconciliation via money compensation or medical fee reduction.

☐ c) Resolved by simple third-party involvement/mediation.

☐ d) Resolved by third-party involvement and reconciliation via money compensation or medical fee reduction.

☐ e) Unresolved even with third-party involvement and the complaint was filed in the court.

3. Which of the following reasons do you think can likely lead to animal medical related disputes?

| Degree to which a cause may lead to a complaint |                 |             |
|-------------------------------------------------|-----------------|-------------|
| 1 - Very unlikely                               | 2 - Unlikely    | 3 - Neutral |
| 4 - Likely                                      | 5 - Very likely |             |

| Degree to which a cause will lead to a complaint                                                                                                                                               |   |   |   |   |   | Possible causes leading to animal medical related disputes or customer complaints                                                                |
|------------------------------------------------------------------------------------------------------------------------------------------------------------------------------------------------|---|---|---|---|---|--------------------------------------------------------------------------------------------------------------------------------------------------|
|                                                                                                                                                                                                | 1 | 2 | 3 | 4 | 5 | Please tick [✓] the most appropriate answer for you in the left column.                                                                          |
| (1) Medical skill (Note: "Veterinarian" means chief attending veterinarian of Veterinary Hospital; It also includes attending veterinarian and other hospital staff; "Client" means pet owner) |   |   |   |   |   |                                                                                                                                                  |
|                                                                                                                                                                                                |   |   |   |   |   | 1.1 Misdiagnosis leading to worsening of patient condition.                                                                                      |
|                                                                                                                                                                                                |   |   |   |   |   | 1.2 Inappropriate/improper hospital care or treatment procedures.                                                                                |
| (2) Modes of communication                                                                                                                                                                     |   |   |   |   |   |                                                                                                                                                  |
|                                                                                                                                                                                                |   |   |   |   |   | 2.1 Explanations from the veterinarians to the clients are too simple.                                                                           |
|                                                                                                                                                                                                |   |   |   |   |   | 2.2 Use of too many medical terms during explanation with no clear supplementary explanation.                                                    |
|                                                                                                                                                                                                |   |   |   |   |   | 2.3 The clients have doubts about the treatment but fail to enquire or get an unsatisfactory answer from the veterinarians before the treatment. |

|                                                                    |  |  |  |  |  |     |                                                                                                                                                                                                          |
|--------------------------------------------------------------------|--|--|--|--|--|-----|----------------------------------------------------------------------------------------------------------------------------------------------------------------------------------------------------------|
|                                                                    |  |  |  |  |  | 2.4 | A gap between clients expected and actual treatment outcomes due to a lack of information for decision-making before the treatment.                                                                      |
|                                                                    |  |  |  |  |  | 2.5 | No precise decision being made by the clients' families during the discussion of subsequent treatment procedures with the veterinarian.                                                                  |
|                                                                    |  |  |  |  |  | 2.6 | The veterinarians do not provide supplementary paper documents to the clients to raise their knowledge level about the treatment.                                                                        |
| (3) Attitudes during interactions                                  |  |  |  |  |  |     |                                                                                                                                                                                                          |
|                                                                    |  |  |  |  |  | 3.1 | The veterinarians try to make the clients reluctantly accept the recommended diagnosis and treatments.                                                                                                   |
|                                                                    |  |  |  |  |  | 3.2 | The veterinarians do not respond appropriately or take appropriate steps to solve the clients' concerns.                                                                                                 |
|                                                                    |  |  |  |  |  | 3.3 | The veterinarians do not give feelings of support and encouragement during interactions, resulting in the clients' thinking that the veterinarian may not be concerned about the health of sick animals. |
|                                                                    |  |  |  |  |  | 3.4 | When the clients' and veterinarians' views on the animals' condition differ, the client tends to stick with their subjective perception.                                                                 |
| (4) Medical expenses                                               |  |  |  |  |  |     |                                                                                                                                                                                                          |
|                                                                    |  |  |  |  |  | 4.1 | The veterinarians do not explain to the clients in advance the possible total medical expenses.                                                                                                          |
|                                                                    |  |  |  |  |  | 4.2 | The veterinarians do not clearly explain the possible medical costs for each treatment procedure.                                                                                                        |
|                                                                    |  |  |  |  |  | 4.3 | The disparity between clients expected and actual medical costs.                                                                                                                                         |
| (5) Complaints management                                          |  |  |  |  |  |     |                                                                                                                                                                                                          |
|                                                                    |  |  |  |  |  | 5.1 | The veterinarians did nothing to respond to the complaints in time.                                                                                                                                      |
|                                                                    |  |  |  |  |  | 5.2 | Absence of senior staff to attend to the complaints.                                                                                                                                                     |
|                                                                    |  |  |  |  |  | 5.3 | The complaint resolution process was done with inappropriate attitudes and improper ways.                                                                                                                |
|                                                                    |  |  |  |  |  | 5.4 | Staff members do not have relevant professional training to handle the complaints.                                                                                                                       |
| (6) Clients' perceptions                                           |  |  |  |  |  |     |                                                                                                                                                                                                          |
|                                                                    |  |  |  |  |  | 6.1 | The clients depend on self-gathered information.                                                                                                                                                         |
|                                                                    |  |  |  |  |  | 6.2 | The clients have many questions about treatment and lack trust in the interaction.                                                                                                                       |
|                                                                    |  |  |  |  |  | 6.3 | The clients' misconception of pets being taken care of by the veterinarian.                                                                                                                              |
|                                                                    |  |  |  |  |  | 6.4 | The clients may have the motives of extortion.                                                                                                                                                           |
| Other causes (except the before mentioned causes), please explain: |  |  |  |  |  |     |                                                                                                                                                                                                          |
